# Supplementary material
Source: publisher figshare collection journal article supplement (https://acs.figshare.com/ndownloader/files/5092456)
Supplement: Supplementary file 1 [file 5092456]

  data_global
# 1. SUBMISSION DETAILS

_publ_contact_autor
;
        Angeles Monge
        Instituto de Ciencia de Materiales
        CSIC
        Sor Juana Ines de la Cruz, 3
        28049 MADRID
        Spain
;
_publ_contact_author_phone        '34 1 334-9025'
_publ_contact_author_fax          '34 1 372-0623'
_publ_contact_author_email        amonge@icmm.csic.es
_publ_requested_journal           'Chem. Mater.'
_publ_requested_coeditor_name

_publ_contact_letter
;
  ?
;

#==============================================================================

# 3. TITLE AND AUTHOR LIST

_publ_section_title
;Metal-organic scandium framework: useful material for hydrogen storage and catalysis";

loop_
 _publ_author_name
 _publ_author_address
     'Josefina Perles'
;
        Instituto de Ciencia de Materiales
        CSIC
        Sor Juana Ines de la Cruz, 3
        28049 MADRID
        Spain
;
     'Marta Iglesias'
;
        Instituto de Ciencia de Materiales
        CSIC
        Sor Juana Ines de la Cruz, 3
        28049 MADRID
        Spain
;
     'M. Angeles Mart�n-Luengo'
;
        Instituto de Ciencia de Materiales
        CSIC
        Sor Juana Ines de la Cruz, 3
        28049 MADRID
        Spain
;
     'Angeles Monge'
;
        Instituto de Ciencia de Materiales
        CSIC
        Sor Juana Ines de la Cruz, 3
        28049 MADRID
        Spain
;
    'Caridad Ruiz-Valero'
;
        Instituto de Ciencia de Materiales
        CSIC
        Sor Juana Ines de la Cruz, 3
        28049 MADRID
        Spain
;
    'Natalia Snejko'
;
        Instituto de Ciencia de Materiales
        CSIC
        Sor Juana Ines de la Cruz, 3
        28049 MADRID
        Spain
;
#==============================================================================

# 4. TEXT

_publ_section_abstract
;

;
_publ_section_comment
;

;
_publ_section_experimental
;

;
_publ_section_references
;

;

_publ_section_figure_captions
;

;
_publ_section_acknowledgements
;
  
  
data_sc2ter3 
  
_audit_creation_method            SHELXL-97 
_chemical_name_systematic 
; 
 ? 
; 
_chemical_name_common             ? 
_chemical_melting_point           ? 
_chemical_formula_moiety          'C12 H6 O6 Sc' 
_chemical_formula_sum 
 'C12 H6 O6 Sc' 
_chemical_formula_weight          291.13 
  
loop_ 
 _atom_type_symbol 
 _atom_type_description 
 _atom_type_scat_dispersion_real 
 _atom_type_scat_dispersion_imag 
 _atom_type_scat_source 
 'C'  'C'   0.0033   0.0016 
 'International Tables Vol C Tables 4.2.6.8 and 6.1.1.4' 
 'H'  'H'   0.0000   0.0000 
 'International Tables Vol C Tables 4.2.6.8 and 6.1.1.4' 
 'O'  'O'   0.0106   0.0060 
 'International Tables Vol C Tables 4.2.6.8 and 6.1.1.4' 
 'Sc'  'Sc'   0.2519   0.3716 
 'International Tables Vol C Tables 4.2.6.8 and 6.1.1.4' 
  
_symmetry_cell_setting            Orthorhombic 
_symmetry_space_group_name_H-M    Fddd 
  
loop_ 
 _symmetry_equiv_pos_as_xyz 
 'x, y, z' 
 '-x+3/4, -y+3/4, z' 
 '-x+3/4, y, -z+3/4' 
 'x, -y+3/4, -z+3/4' 
 'x, y+1/2, z+1/2' 
 '-x+3/4, -y+5/4, z+1/2' 
 '-x+3/4, y+1/2, -z+5/4' 
 'x, -y+5/4, -z+5/4' 
 'x+1/2, y, z+1/2' 
 '-x+5/4, -y+3/4, z+1/2' 
 '-x+5/4, y, -z+5/4' 
 'x+1/2, -y+3/4, -z+5/4' 
 'x+1/2, y+1/2, z' 
 '-x+5/4, -y+5/4, z' 
 '-x+5/4, y+1/2, -z+3/4' 
 'x+1/2, -y+5/4, -z+3/4' 
 '-x, -y, -z' 
 'x-3/4, y-3/4, -z' 
 'x-3/4, -y, z-3/4' 
 '-x, y-3/4, z-3/4' 
 '-x, -y+1/2, -z+1/2' 
 'x-3/4, y-1/4, -z+1/2' 
 'x-3/4, -y+1/2, z-1/4' 
 '-x, y-1/4, z-1/4' 
 '-x+1/2, -y, -z+1/2' 
 'x-1/4, y-3/4, -z+1/2' 
 'x-1/4, -y, z-1/4' 
 '-x+1/2, y-3/4, z-1/4' 
 '-x+1/2, -y+1/2, -z' 
 'x-1/4, y-1/4, -z' 
 'x-1/4, -y+1/2, z-3/4' 
 '-x+1/2, y-1/4, z-3/4' 
  
_cell_length_a                    8.7433(5) 
_cell_length_b                    20.7448(11) 
_cell_length_c                    34.3664(18) 
_cell_angle_alpha                 90.00 
_cell_angle_beta                  90.00 
_cell_angle_gamma                 90.00 
_cell_volume                      6233.3(6) 
_cell_formula_units_Z             16 
_cell_measurement_temperature     275(2) 
_cell_measurement_reflns_used     5156 
_cell_measurement_theta_min       2.37 
_cell_measurement_theta_max       28.93 
  
_exptl_crystal_description        prismatic 
_exptl_crystal_colour             colorless 
_exptl_crystal_size_max           0.30 
_exptl_crystal_size_mid           0.30 
_exptl_crystal_size_min           0.30 
_exptl_crystal_density_meas       0 
_exptl_crystal_density_diffrn     1.241 
_exptl_crystal_density_method     'not measured' 
_exptl_crystal_F_000              2352 
_exptl_absorpt_coefficient_mu     0.487 
_exptl_absorpt_correction_type    Semi-empirical 
_exptl_absorpt_correction_T_min   0.8677 
_exptl_absorpt_correction_T_max   0.8677 
_exptl_absorpt_process_details    SADABS 
  
_exptl_special_details 
; 
 ? 
; 
  
_diffrn_ambient_temperature       275(2) 
_diffrn_radiation_wavelength      0.71073 
_diffrn_radiation_type            MoK\a 
_diffrn_radiation_source          'fine-focus sealed tube' 
_diffrn_radiation_monochromator   graphite 
_diffrn_measurement_device_type   'CCD area detector' 
_diffrn_measurement_method        'phi and omega scans' 
_diffrn_detector_area_resol_mean  ? 
_diffrn_standards_number          ? 
_diffrn_standards_interval_count  ? 
_diffrn_standards_interval_time   ? 
_diffrn_standards_decay_%         ? 
_diffrn_reflns_number             7608 
_diffrn_reflns_av_R_equivalents   0.0219 
_diffrn_reflns_av_sigmaI/netI     0.0198 
_diffrn_reflns_limit_h_min        -11 
_diffrn_reflns_limit_h_max        10 
_diffrn_reflns_limit_k_min        -19 
_diffrn_reflns_limit_k_max        23 
_diffrn_reflns_limit_l_min        -46 
_diffrn_reflns_limit_l_max        18 
_diffrn_reflns_theta_min          2.29 
_diffrn_reflns_theta_max          28.99 
_reflns_number_total              1778 
_reflns_number_gt                 1577 
_reflns_threshold_expression      >2sigma(I) 
  
_computing_data_collection        'Bruker SMART' 
_computing_cell_refinement        'Bruker SMART' 
_computing_data_reduction         'Bruker SAINT' 
_computing_structure_solution     'SHELXS-97 (Sheldrick, 1990)' 
_computing_structure_refinement   'SHELXL-97 (Sheldrick, 1997)' 
_computing_molecular_graphics     'Bruker SHELXTL' 
_computing_publication_material   'Bruker SHELXTL' 
  
_refine_special_details 
; 
 Refinement of F^2^ against ALL reflections.  The weighted R-factor wR and 
 goodness of fit S are based on F^2^, conventional R-factors R are based 
 on F, with F set to zero for negative F^2^. The threshold expression of 
 F^2^ > 2sigma(F^2^) is used only for calculating R-factors(gt) etc. and is 
 not relevant to the choice of reflections for refinement.  R-factors based 
 on F^2^ are statistically about twice as large as those based on F, and R- 
 factors based on ALL data will be even larger. 
; 
  
_refine_ls_structure_factor_coef  Fsqd 
_refine_ls_matrix_type            full 
_refine_ls_weighting_scheme       calc 
_refine_ls_weighting_details 
 'calc w=1/[\s^2^(Fo^2^)+(0.0322P)^2^+13.9225P] where P=(Fo^2^+2Fc^2^)/3' 
_atom_sites_solution_primary      direct 
_atom_sites_solution_secondary    difmap 
_atom_sites_solution_hydrogens    geom 
_refine_ls_hydrogen_treatment     mixed 
_refine_ls_extinction_method      SHELXL 
_refine_ls_extinction_coef        ? 
_refine_ls_extinction_expression 
 'Fc^*^=kFc[1+0.001xFc^2^\l^3^/sin(2\q)]^-1/4^' 
_refine_ls_number_reflns          1778 
_refine_ls_number_parameters      101 
_refine_ls_number_restraints      0 
_refine_ls_R_factor_all           0.0370 
_refine_ls_R_factor_gt            0.0306 
_refine_ls_wR_factor_ref          0.0793 
_refine_ls_wR_factor_gt           0.0773 
_refine_ls_goodness_of_fit_ref    1.092 
_refine_ls_restrained_S_all       1.092 
_refine_ls_shift/su_max           0.015 
_refine_ls_shift/su_mean          0.002 
  
loop_ 
 _atom_site_label 
 _atom_site_type_symbol 
 _atom_site_fract_x 
 _atom_site_fract_y 
 _atom_site_fract_z 
 _atom_site_U_iso_or_equiv 
 _atom_site_adp_type 
 _atom_site_occupancy 
 _atom_site_symmetry_multiplicity 
 _atom_site_calc_flag 
 _atom_site_refinement_flags 
 _atom_site_disorder_assembly 
 _atom_site_disorder_group 
Sc1 Sc 0.3750 0.8750 0.135677(9) 0.01548(12) Uani 1 2 d S . . 
O1 O 0.50527(14) 0.79181(6) 0.13531(5) 0.0439(4) Uani 1 1 d . . . 
O2 O 0.24530(14) 0.83425(8) 0.09257(4) 0.0481(4) Uani 1 1 d . . . 
O3 O 0.24125(13) 0.83332(7) 0.17946(3) 0.0367(3) Uani 1 1 d . . . 
C1 C 0.6250 0.76357(12) 0.1250 0.0317(5) Uani 1 2 d S . . 
C2 C 0.6250 0.69190(12) 0.1250 0.0352(6) Uani 1 2 d S . . 
C3 C 0.4891(2) 0.65830(11) 0.12549(10) 0.0589(7) Uani 1 1 d . . . 
C5 C 0.04961(18) 0.78357(10) 0.21752(5) 0.0348(4) Uani 1 1 d . . . 
C4 C 0.10219(18) 0.81972(9) 0.18230(4) 0.0309(4) Uani 1 1 d . . . 
C6 C -0.1037(2) 0.76946(13) 0.22228(6) 0.0550(7) Uani 1 1 d . . . 
C7 C 0.1532(2) 0.76415(13) 0.24527(6) 0.0542(7) Uani 1 1 d . . . 
H7 H 0.263(3) 0.7754(11) 0.2411(7) 0.065(7) Uiso 1 1 d . . . 
H6 H -0.174(3) 0.7859(11) 0.2043(7) 0.060(7) Uiso 1 1 d . . . 
H3 H 0.401(3) 0.6811(14) 0.1252(9) 0.085(9) Uiso 1 1 d . . . 
  
loop_ 
 _atom_site_aniso_label 
 _atom_site_aniso_U_11 
 _atom_site_aniso_U_22 
 _atom_site_aniso_U_33 
 _atom_site_aniso_U_23 
 _atom_site_aniso_U_13 
 _atom_site_aniso_U_12 
Sc1 0.01566(17) 0.0160(2) 0.01479(16) 0.000 0.000 -0.00015(14) 
O1 0.0311(6) 0.0178(8) 0.0829(10) 0.0025(6) 0.0080(6) 0.0062(5) 
O2 0.0278(6) 0.0804(11) 0.0360(6) -0.0374(7) -0.0032(5) 0.0008(6) 
O3 0.0246(6) 0.0559(9) 0.0296(6) 0.0203(5) 0.0013(4) -0.0067(5) 
C1 0.0255(10) 0.0183(14) 0.0511(13) 0.000 -0.0016(10) 0.000 
C2 0.0257(11) 0.0140(14) 0.0660(16) 0.000 0.0009(11) 0.000 
C3 0.0224(9) 0.0183(11) 0.136(2) 0.0049(12) 0.0028(12) 0.0024(7) 
C5 0.0238(8) 0.0534(13) 0.0270(7) 0.0223(8) -0.0004(6) -0.0040(7) 
C4 0.0257(8) 0.0418(11) 0.0252(7) 0.0177(7) 0.0006(6) 0.0000(7) 
C6 0.0241(8) 0.100(2) 0.0409(9) 0.0458(11) -0.0071(7) -0.0077(10) 
C7 0.0220(8) 0.097(2) 0.0440(10) 0.0432(11) -0.0042(7) -0.0110(9) 
  
_geom_special_details 
; 
 All esds (except the esd in the dihedral angle between two l.s. planes) 
 are estimated using the full covariance matrix.  The cell esds are taken 
 into account individually in the estimation of esds in distances, angles 
 and torsion angles; correlations between esds in cell parameters are only 
 used when they are defined by crystal symmetry.  An approximate (isotropic) 
 treatment of cell esds is used for estimating esds involving l.s. planes. 
; 
  
loop_ 
 _geom_bond_atom_site_label_1 
 _geom_bond_atom_site_label_2 
 _geom_bond_distance 
 _geom_bond_site_symmetry_2 
 _geom_bond_publ_flag 
Sc1 O2 2.0482(12) . ? 
Sc1 O2 2.0482(12) 2_565 ? 
Sc1 O1 2.0678(12) 2_565 ? 
Sc1 O1 2.0678(13) . ? 
Sc1 O3 2.0928(11) 2_565 ? 
Sc1 O3 2.0928(11) . ? 
O1 C1 1.2508(17) . ? 
O2 C4 1.2443(19) 11_454 ? 
O3 C4 1.2520(19) . ? 
C1 O1 1.2508(17) 11_554 ? 
C1 C2 1.487(4) . ? 
C2 C3 1.377(2) . ? 
C2 C3 1.377(2) 11_554 ? 
C3 C3 1.382(4) 8_554 ? 
C5 C7 1.376(2) . ? 
C5 C6 1.382(2) . ? 
C5 C4 1.496(2) . ? 
C4 O2 1.2443(19) 11_454 ? 
C6 C7 1.385(2) 21_565 ? 
C7 C6 1.385(2) 21_565 ? 
  
loop_ 
 _geom_angle_atom_site_label_1 
 _geom_angle_atom_site_label_2 
 _geom_angle_atom_site_label_3 
 _geom_angle 
 _geom_angle_site_symmetry_1 
 _geom_angle_site_symmetry_3 
 _geom_angle_publ_flag 
O2 Sc1 O2 87.35(8) . 2_565 ? 
O2 Sc1 O1 92.01(6) . 2_565 ? 
O2 Sc1 O1 87.48(6) 2_565 2_565 ? 
O2 Sc1 O1 87.48(6) . . ? 
O2 Sc1 O1 92.01(6) 2_565 . ? 
O1 Sc1 O1 179.29(9) 2_565 . ? 
O2 Sc1 O3 179.62(5) . 2_565 ? 
O2 Sc1 O3 92.30(5) 2_565 2_565 ? 
O1 Sc1 O3 88.14(5) 2_565 2_565 ? 
O1 Sc1 O3 92.37(6) . 2_565 ? 
O2 Sc1 O3 92.30(5) . . ? 
O2 Sc1 O3 179.62(5) 2_565 . ? 
O1 Sc1 O3 92.37(6) 2_565 . ? 
O1 Sc1 O3 88.13(5) . . ? 
O3 Sc1 O3 88.04(7) 2_565 . ? 
C1 O1 Sc1 148.61(14) . . ? 
C4 O2 Sc1 167.47(13) 11_454 . ? 
C4 O3 Sc1 133.78(10) . . ? 
O1 C1 O1 124.1(2) . 11_554 ? 
O1 C1 C2 117.93(12) . . ? 
O1 C1 C2 117.93(12) 11_554 . ? 
C3 C2 C3 119.2(3) . 11_554 ? 
C3 C2 C1 120.40(13) . . ? 
C3 C2 C1 120.40(13) 11_554 . ? 
C2 C3 C3 120.37(13) . 8_554 ? 
C7 C5 C6 119.66(15) . . ? 
C7 C5 C4 120.34(14) . . ? 
C6 C5 C4 120.00(14) . . ? 
O2 C4 O3 123.86(14) 11_454 . ? 
O2 C4 C5 117.82(14) 11_454 . ? 
O3 C4 C5 118.32(14) . . ? 
C5 C6 C7 120.36(16) . 21_565 ? 
C5 C7 C6 119.98(16) . 21_565 ? 
  
_diffrn_measured_fraction_theta_max    0.856 
_diffrn_reflns_theta_full              28.99 
_diffrn_measured_fraction_theta_full   0.856 
_refine_diff_density_max    0.277 
_refine_diff_density_min   -0.279 
_refine_diff_density_rms    0.047 
